# Supplementary material for: Post-Harvest Non-Conventional and Traditional Methods to Control Cadophora luteo-olivacea: Skin Pitting Agent of Actinidia chinensis var. deliciosa (A. Chev.)
Source: MDPI journal article supplement (doi:10.3390/horticulturae7070169), 2021-07-01
Supplement: s1 [file s1]

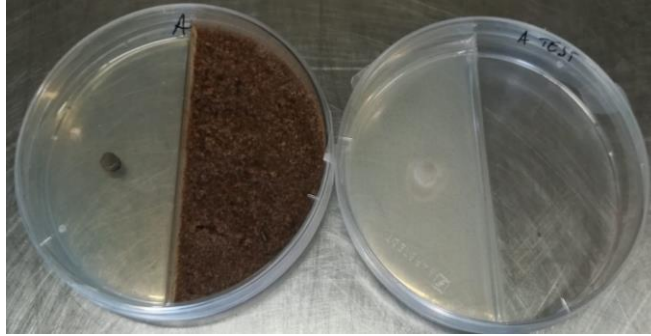

**Figure S1:** *Brassica nigra* defatted meal biofumigation treatment on *Cadophora luteo-olivacea* isolate *CadA* mycelial growth (mm).
